# Supplementary figures and images for: RTP801 mediates transneuronal toxicity in culture via extracellular vesicles
Source: PubMed Central journal article supplement — J Extracell Vesicles. 2023 Nov 6;12(11):12378. doi: 10.1002/jev2.12378 (PMC10627824; doi:10.1002/jev2.12378), 2023-11-06

**FIGURE S5**

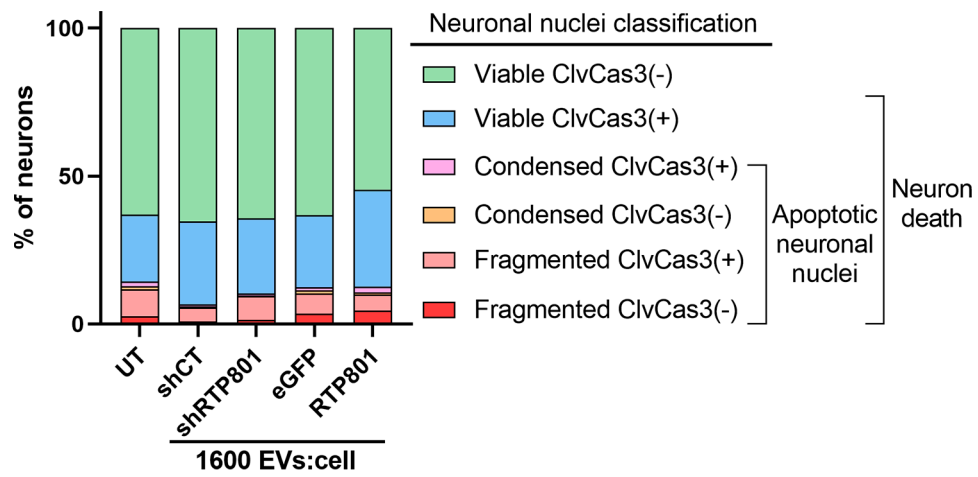

Supplement: JEV2-12-12378-s001.pdf [file JEV2-12-12378-s001.pdf]

## FIGURE S2

**A**

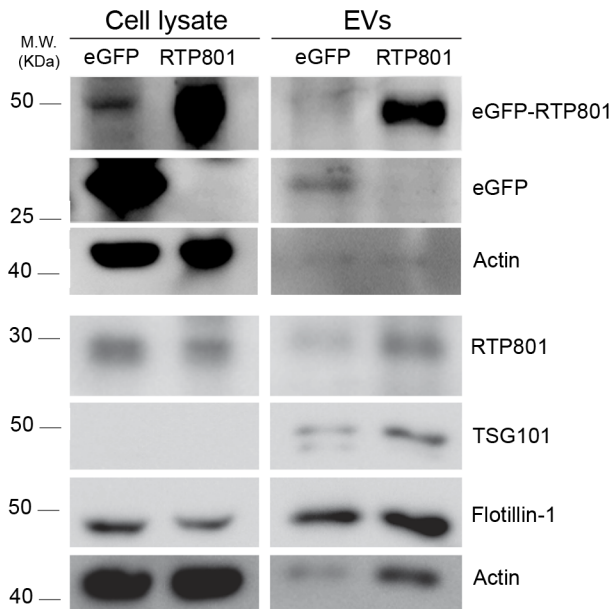

**B**

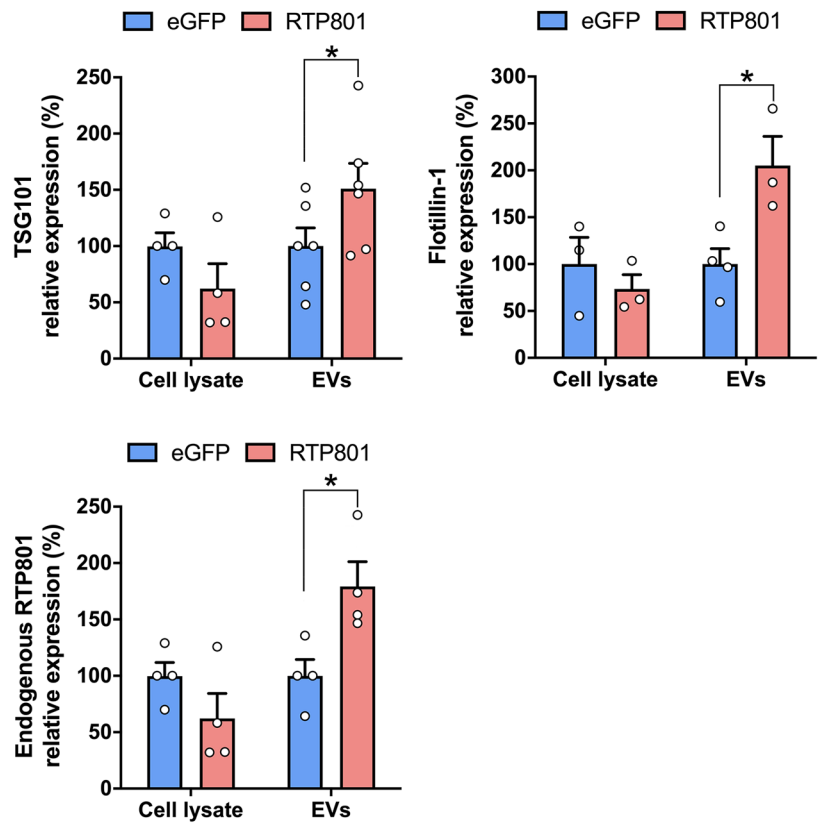

Supplement: JEV2-12-12378-s002.pdf [file JEV2-12-12378-s002.pdf]

**FIGURE S4**

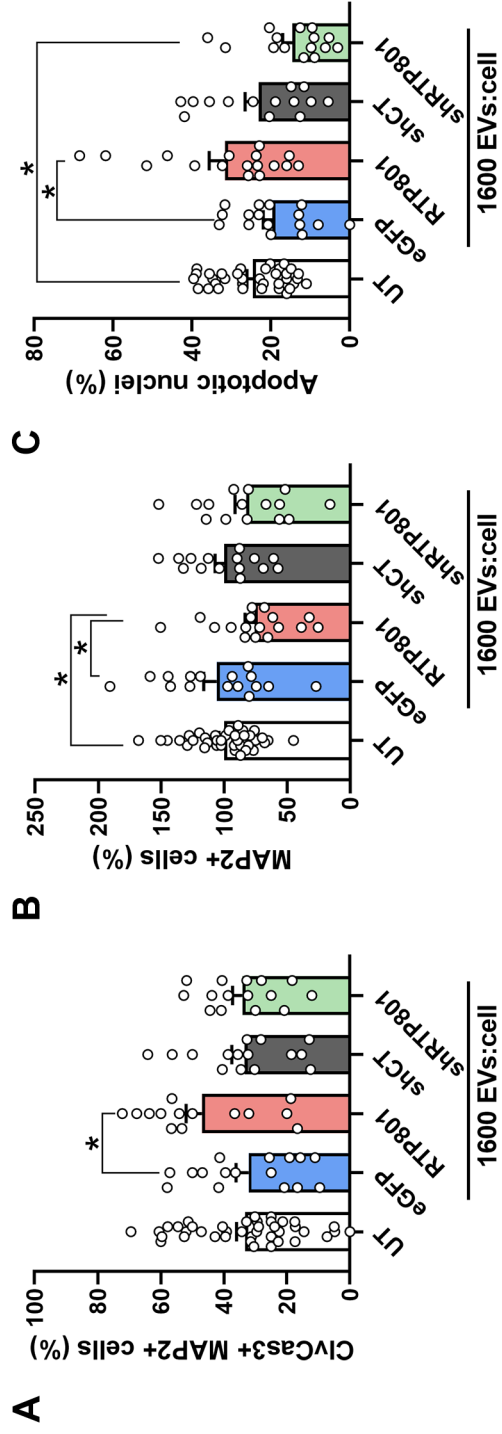

Supplement: JEV2-12-12378-s003.pdf [file JEV2-12-12378-s003.pdf]

**FIGURE S8**

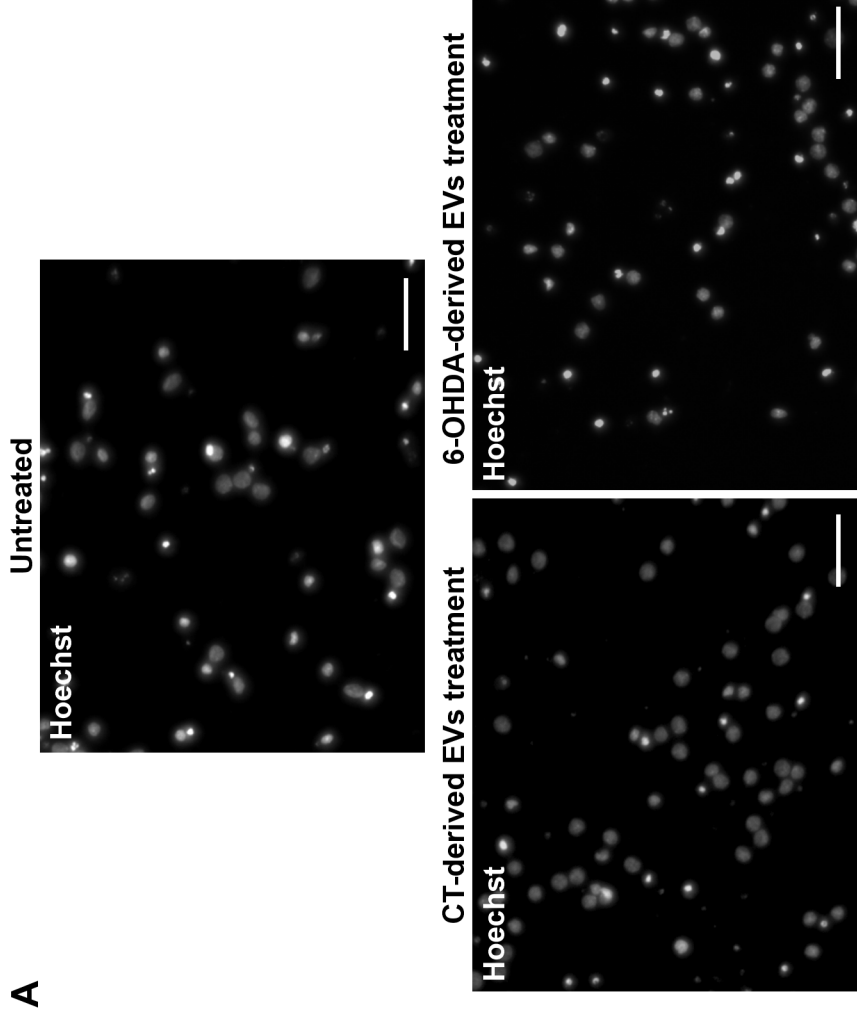

Supplement: JEV2-12-12378-s004.pdf [file JEV2-12-12378-s004.pdf]

Figure 1

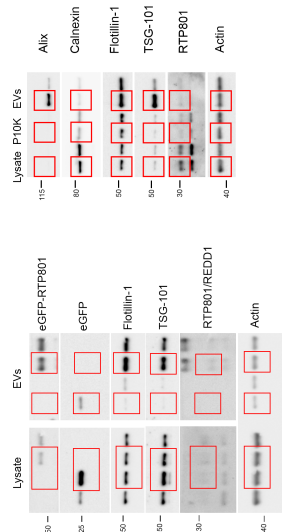

Figure 5

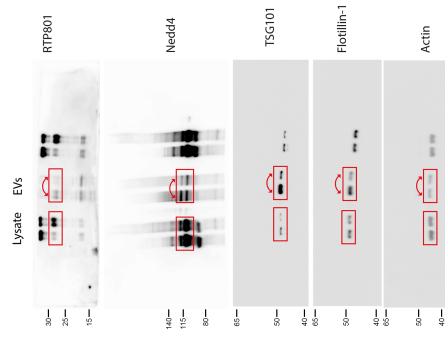

Figure 6

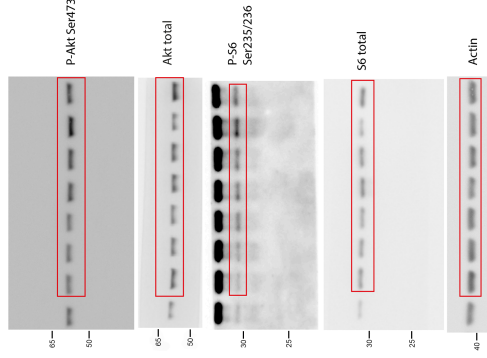

Figure 7

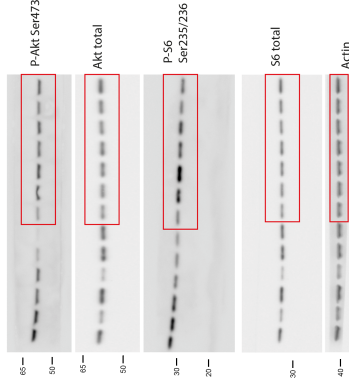

Figure S2

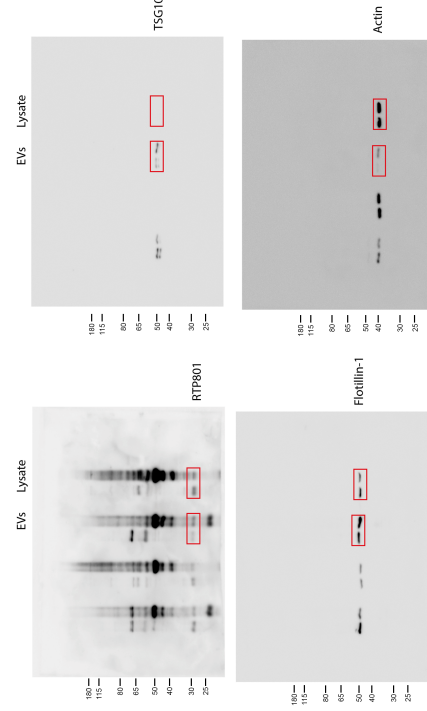

Figure S9

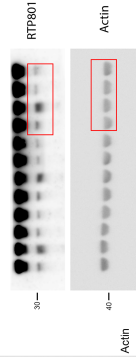

Figure S10

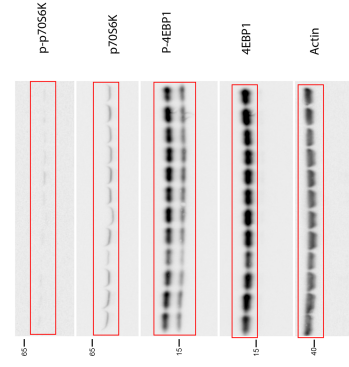

Supplement: JEV2-12-12378-s005.pdf [file JEV2-12-12378-s005.pdf]

**FIGURE S7**

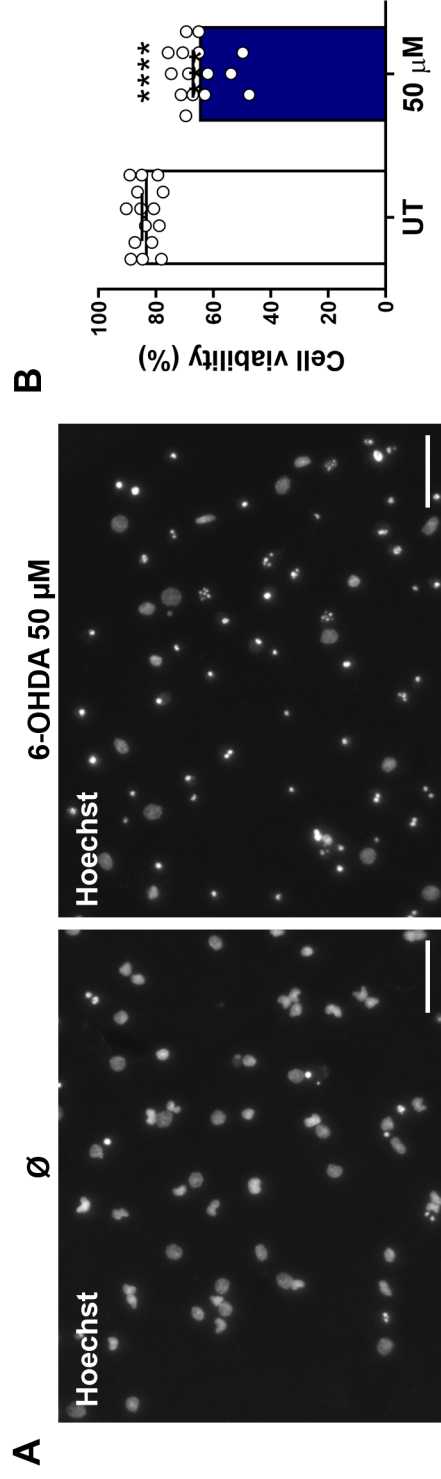

Supplement: JEV2-12-12378-s006.pdf [file JEV2-12-12378-s006.pdf]

**FIGURE S3**

**A**

Group ○ GFP △ RTP801

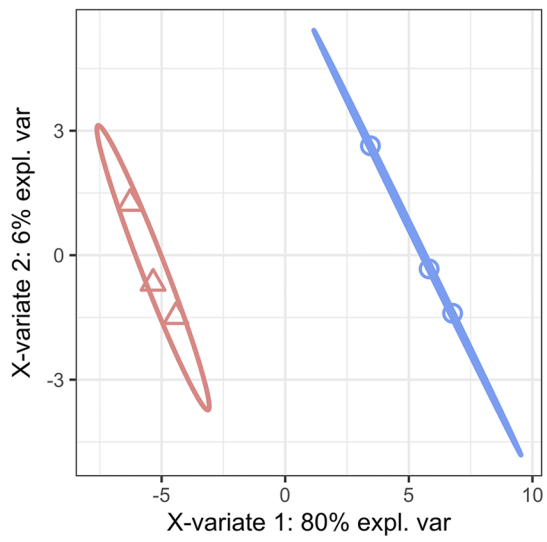

**B**

Group ○ shCT △ shRTP801

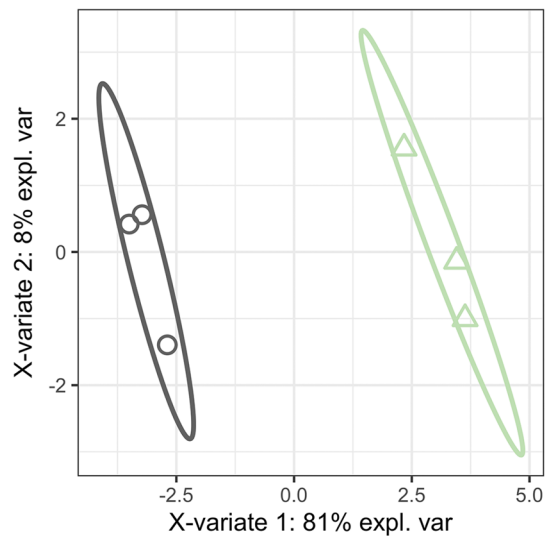

Supplement: JEV2-12-12378-s007.pdf [file JEV2-12-12378-s007.pdf]

**FIGURE S1**

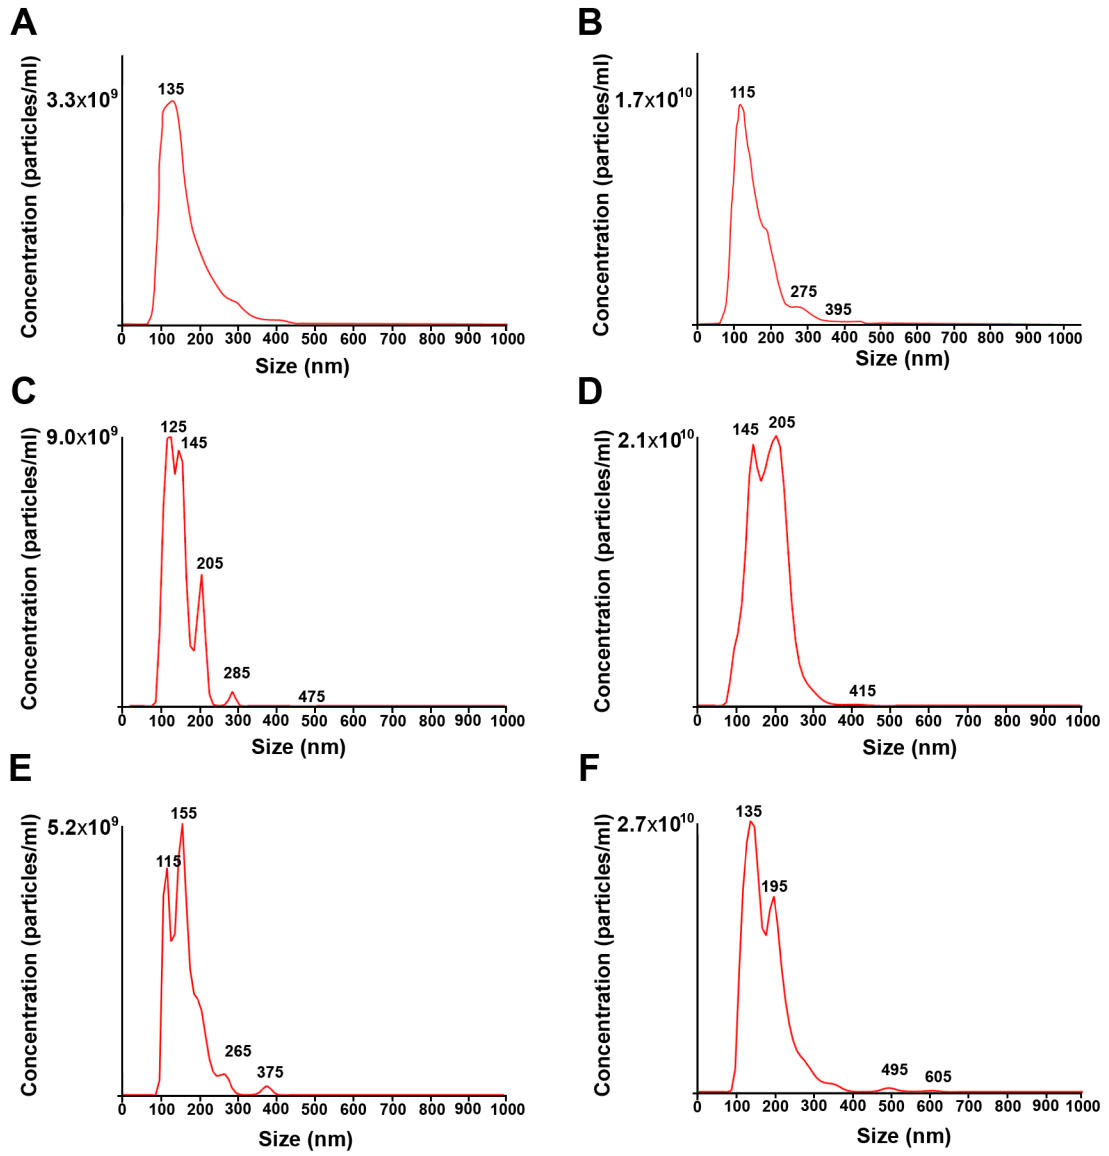

Supplement: JEV2-12-12378-s008.pdf [file JEV2-12-12378-s008.pdf]

**FIGURE S9**

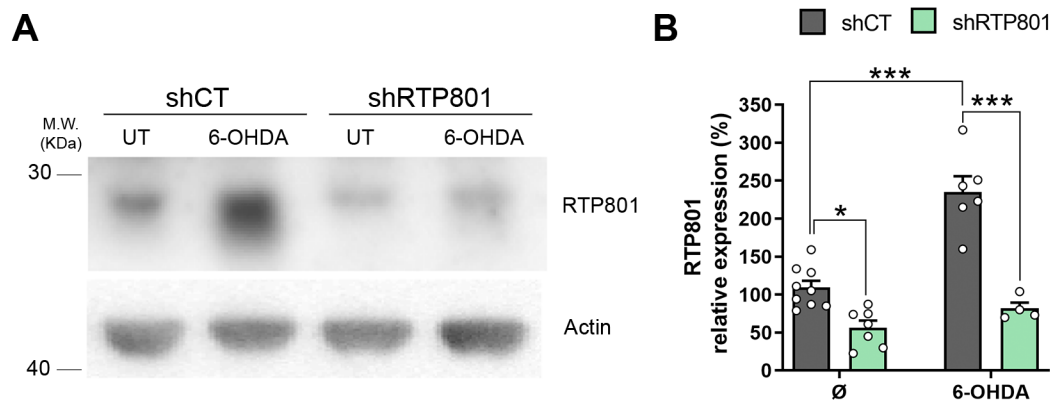

Supplement: JEV2-12-12378-s009.pdf [file JEV2-12-12378-s009.pdf]

**FIGURE S10**

**A**

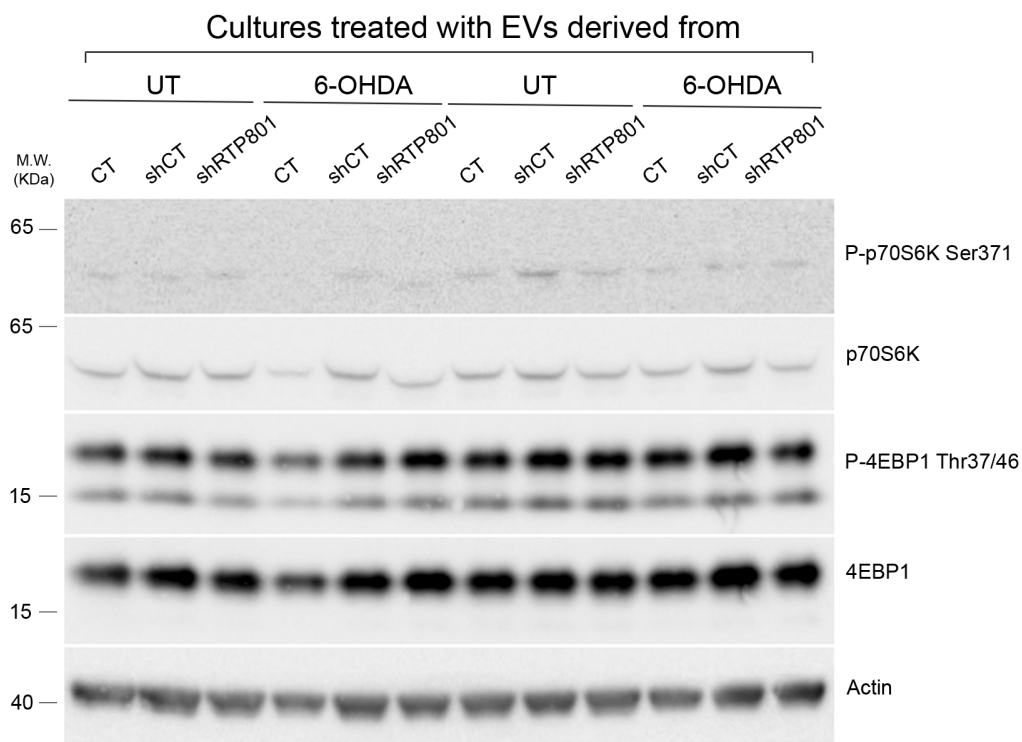

**B**

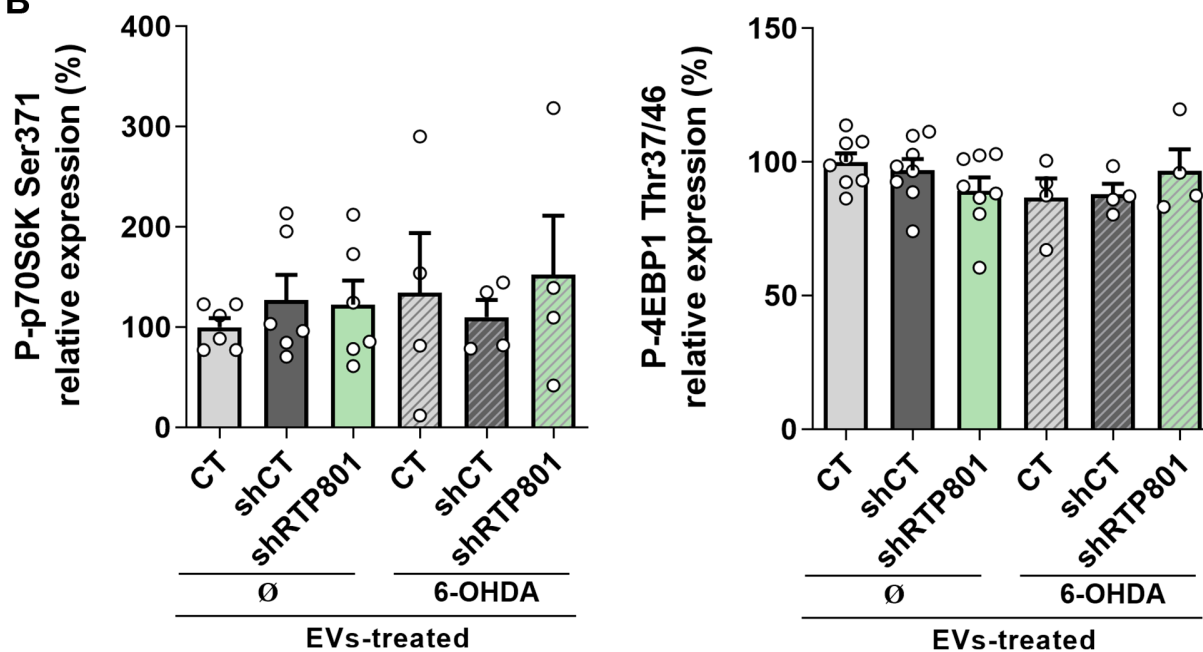

Supplement: JEV2-12-12378-s010.pdf [file JEV2-12-12378-s010.pdf]

**FIGURE S6**

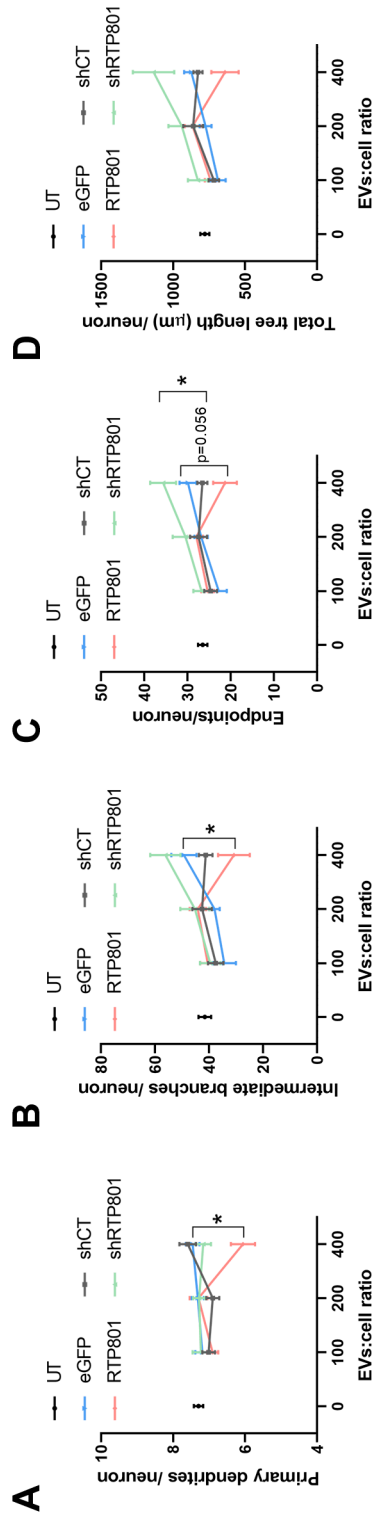

Supplement: JEV2-12-12378-s011.pdf [file JEV2-12-12378-s011.pdf]
